# Supplementary material
Source: PubMed Central journal article supplement (PMC2442375)
Supplement: hesr0043-0773-SD2.pdf [file hesr0043-0773-SD2.pdf]

1 **APPENDIX.**  
2 **Members of Commission to End Health Care Disparities**  
3 Agency for Healthcare Research and Quality, Alliance of Minority Medical Associations, AMA -  
4 American Medical Association, AMA - Council on Ethical and Judicial Affairs, AMA - Council on  
5 Scientific Affairs, AMA - Minority Affairs Consortium, AMA - Women Physicians Congress,  
6 American Academy of Allergy, Asthma & Immunology, American Academy of Dermatology  
7 Association, American Academy of Family Physicians, American Academy of Ophthalmology,  
8 American Academy of Pediatrics, American Association of Public Health Physicians, American  
9 College of Cardiology, American College of Emergency Physicians, American College of Obstetricians  
10 and Gynecologists, American College of Physicians, American College of Preventive Medicine,  
11 American College of Surgeons, American Medical Women's Association, American Osteopathic  
12 Association, American Psychiatric Association, American Public Health Association, American Society  
13 of Addiction Medicine, American Society of Clinical Oncology, Association of American Indian  
14 Physicians, Association of American Medical Colleges, California Medical Association, California  
15 Medical Association Foundation, Chicago Medical Society, Florida Medical Association Inc, Health  
16 Resources and Services Administration, Illinois State Medical Society, Massachusetts Medical Society,  
17 Medical Society of New Jersey, Medical Society of the State of New York, Michigan State Medical  
18 Society, National Black Nurses Association, National Hispanic Medical Association, National Medical  
19 Association, National Pharmaceutical Council, Ohio State Medical Association, Partnership for  
20 Prevention, Pfizer Inc, Society of Critical Care Medicine, Texas Medical Association, The CHEST  
21 Foundation (ACCP), Uniformed Services University, White House Initiative on Asian Americans and  
22 Pacific Islanders  
23

24 **Members of the Data Gathering Committee under which this work was completed**  
25 Helen Burstin, MD, MPH  
26 Steven Combs, MD  
27 James Christian, Sr., Esq  
28 Kaytura Felix Aaron, MD  
29 Robert A. Gilchick, MD, MPH  
30 Patrik Johansson, MD, MPH  
31 Christine L.M. Joseph, PhD, MPH  
32 Molly Katz, MD  
33 Richard Levy, PhD  
34 Anelle Primm, MD  
35 Gary Puckerin, PhD  
36 John F. Schneider, MD, PhD  
37 Diane Washington, MD  
38 Karen Williams  
39  
40  
41  
42  
43  
44



79 **ITEMS EXCLUDED FROM FINAL MODEL**

80

81 **AWARENESS**

82 10. I am knowledgeable about the health needs of minority patients.

83  $\theta_1$  Strongly disagree  $\theta_2$  Disagree  $\theta_3$  Neutral  $\theta_4$  Agree  $\theta_5$  Strongly agree

84

85 11. I am alert to stereotypes that may result in a lower quality of care for minority patients in my  
86 practice.

87  $\theta_1$  Strongly disagree  $\theta_2$  Disagree  $\theta_3$  Neutral  $\theta_4$  Agree  $\theta_5$  Strongly agree

88

89

90 **REFLECTION/EMPOWERMENT**

91 12. It is possible to provide high quality care to all my patients.

92  $\theta_1$  Strongly disagree  $\theta_2$  Disagree  $\theta_3$  Neutral  $\theta_4$  Agree  $\theta_5$  Strongly agree

93

94

95 **ACTION**

96 13. In the last month, have you spoken with a community health worker about the health needs of  
97 patients in your practice community?

98  $o_1$  No  $o_2$  Yes

99

100 14. In the last month, have you written a letter to your representatives in Congress about any specific  
101 health care needs of minority patients?

102  $o_1$  No  $o_2$  Yes

103

104 15. In the last six months, have you read any journal articles that discuss improving the health of  
105 minority patients?

106  $o_1$  No  $o_2$  Yes

107

108

109

110
